# Supplementary material for: Flavored Olive Oil as a Preservation Means of Reduced Salt Spanish Style Green Table Olives (cv. Chalkidiki)
Source: PubMed Central journal article supplement (PMC7916839; doi:10.3390/foods10020392), 2021-02-11
Supplement: foods-10-00392-s001.pdf [file foods-10-00392-s001.pdf]

# Flavored olive oil as a preservation means of reduced salt Spanish style green table olives (cv. Chalkidiki)

Maria Papapostolou<sup>1</sup>, Fani Th. Mantzouridou<sup>1,2</sup> and Maria Z. Tsimidou<sup>1,2\*</sup>

<sup>1</sup> Laboratory of Food Chemistry and Technology (LFCT), School of Chemistry, Aristotle University of Thessaloniki (AUTH), 54124 Thessaloniki, Greece; papaposm@chem.auth.gr (M.P.); fmantz@chem.auth.gr (F.Th.M.)

<sup>2</sup> Natural Products Research Center of Excellence (NatPro-AUTH), Center for Interdisciplinary Research and Innovation (CIRI-AUTH), 57001 Thessaloniki, Greece

\* Correspondence: [tsimidou@chem.auth.gr](mailto:tsimidou@chem.auth.gr) (M.Z.T); Tel: +302310997796

## Supplementary materials

**Table S1.** Values of quality indices for oils EVOO and ROO, used as starting materials.

| Quality index                   | EVOO       | Upper limits EVOO <sup>1</sup> | ROO        | Upper limits ROO <sup>1</sup> |
|---------------------------------|------------|--------------------------------|------------|-------------------------------|
| Acidity (% oleic acid)          | 0.6 ± 0.0  | ≤ 0.8                          | 0.3 ± 0.0  | ≤ 0.30                        |
| PV (meq O <sub>2</sub> /kg oil) | 10.7 ± 0.5 | ≤ 20                           | 4.9 ± 0.1  | ≤ 5.0                         |
| K <sub>232</sub>                | 2.0 ± 0.0  | ≤ 2.5                          | -          | -                             |
| K <sub>270</sub>                | 0.1 ± 0.0  | ≤ 0.22                         | 0.94 ± 0.0 | ≤ 1.25                        |
| Total Htyr & Tyr (mg/20g oil)   | 8.3 ± 0.0  | -                              | 0.0        | -                             |

<sup>1</sup> EU 2568/91 and amendments

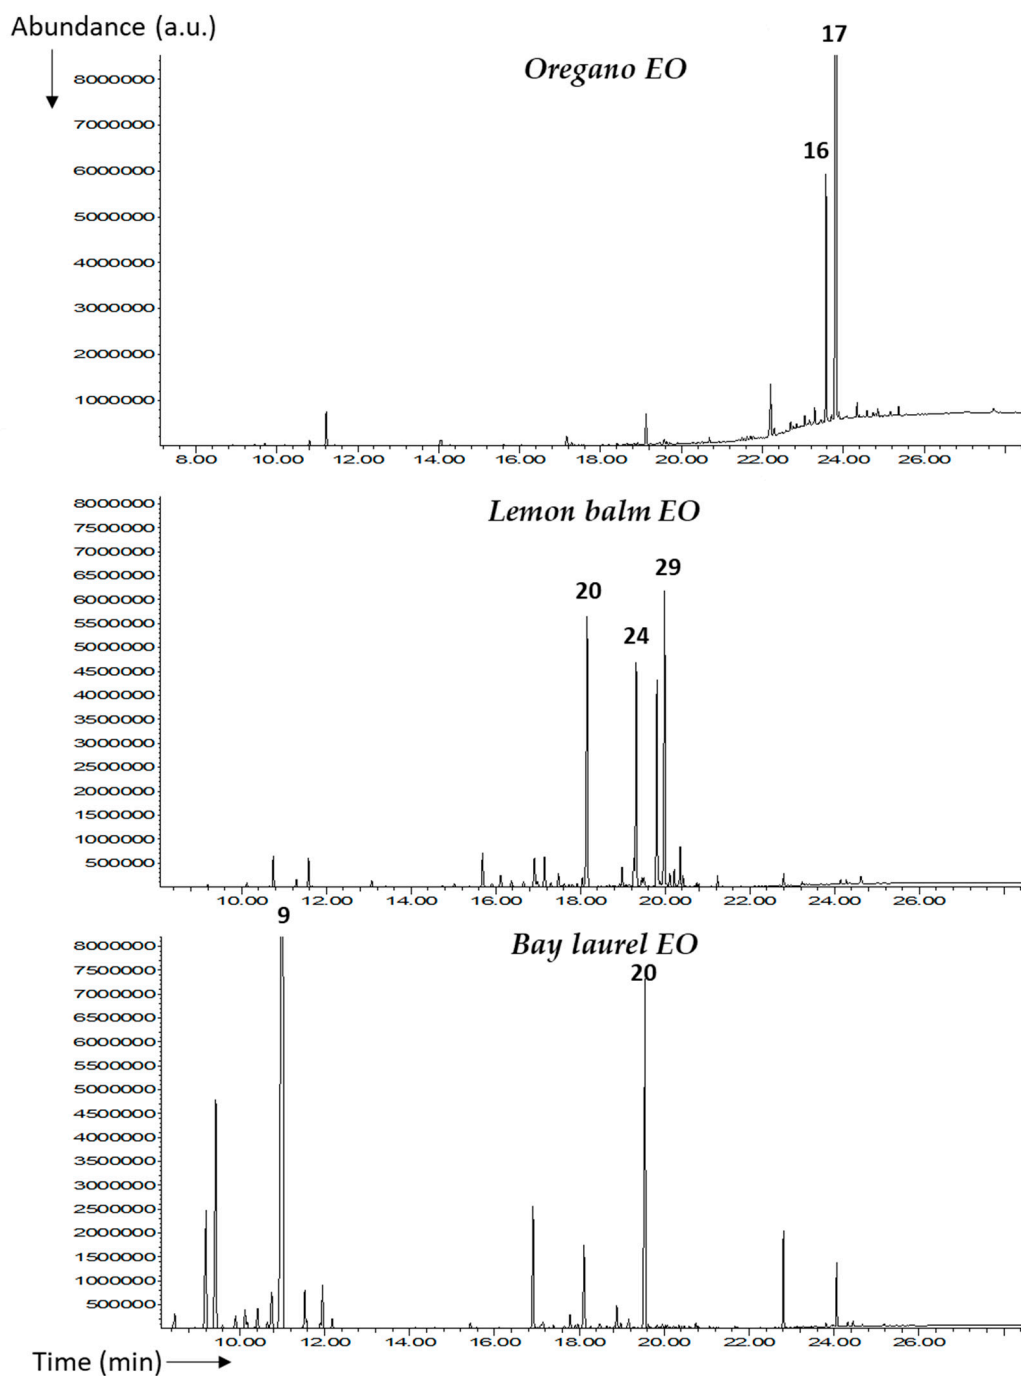

**Figure S1.** GC-MS chromatographic profiles of oregano, lemon balm and bay laurel EOs. Mass spectra of peaks were cross-referenced against the NIST mass spectral library (Version 2.0f, 2008). Peak numbering according to Table S2 for each EO.

**Table S2.** GC-MS data for the constituents of oregano, lemon balm and bay laurel EOs. Mass spectra of peaks were cross-referenced against the NIST mass spectral library (Version 2.0f, 2008).

| Peak No           | RT*  | Compound     | Abundance % | Peak No | RT*   | Compound     | Abundance % |
|-------------------|------|--------------|-------------|---------|-------|--------------|-------------|
| <b>Oregano EO</b> |      |              |             |         |       |              |             |
| 1                 | 9.72 | (+)-2-carene | 0.13        | 10      | 19.58 | unidentified | 0.24        |

|                      |       |                                            |              |              |       |                                                          |              |
|----------------------|-------|--------------------------------------------|--------------|--------------|-------|----------------------------------------------------------|--------------|
| 2                    | 10.81 | $\gamma$ -terpinene                        | 0.24         | 11           | 19.64 | 2-isopropyl-5-methyl-9-methylene-bicyclo-1-decene(4.4.0) | 0.24         |
| 3                    | 11.23 | <i>p</i> -cymene                           | 1.46         | 12           | 20.51 | (-)-calamenene                                           | 0.16         |
| 4                    | 14.06 | dehydro- <i>p</i> -cymene                  | 0.55         | 13           | 20.69 | unidentified                                             | 0.27         |
| 5                    | 17.17 | $\alpha$ -caryophyllene                    | 0.56         | 14           | 22.20 | caryophyllene oxide                                      | 2.73         |
| 6                    | 17.29 | terpinen-4-ol                              | 0.18         | 15           | 23.05 | <i>p</i> -cymen-7-ol                                     | 2.51         |
| 7                    | 18.92 | (-)-borneol                                | 0.28         | 16           | 23.57 | <b>thymol</b>                                            | <b>10.57</b> |
| 8                    | 19.13 | $\beta$ -bisabolene                        | 1.46         | 17           | 23.82 | <b>carvacrol</b>                                         | <b>78.17</b> |
| 9                    | 19.46 | 1.1.6-trimethyl-1.2-dihydronaphthalene     | 0.25         | <b>Total</b> |       |                                                          | <b>100</b>   |
| <b>Lemon balm EO</b> |       |                                            |              |              |       |                                                          |              |
| 1                    | 10.13 | $\beta$ -myrcene                           | 0.24         | 21           | 18.92 | aromadendrene                                            | 0.20         |
| 2                    | 10.75 | limonene                                   | 1.97         | 22           | 18.99 | ( <i>E</i> )- $\beta$ -famesene                          | 1.30         |
| 3                    | 11.30 | <i>trans</i> - $\beta$ -ocimene            | 0.48         | 23           | 19.26 | unidentified                                             | 1.81         |
| 4                    | 11.58 | <i>cis</i> - $\beta$ -ocimene              | 1.75         | 24           | 19.32 | <b>neral</b>                                             | <b>14.41</b> |
| 5                    | 13.08 | sulcatone                                  | 0.44         | 25           | 19.45 | <i>cis</i> -geranic acid methyl ester                    | 0.68         |
| 6                    | 15.03 | 1-octen-3-ol                               | 0.27         | 26           | 19.49 | $\alpha$ -amorphene                                      | 0.80         |
| 7                    | 15.69 | citronellal                                | 2.62         | 27           | 19.80 | germacrene D                                             | 13.54        |
| 8                    | 15.91 | unidentified                               | 0.29         | 28           | 19.89 | 2-isopropyl-5-methyl-9-methylene-bicyclo-1-decene(4.4.0) | 0.29         |
| 9                    | 16.12 | $\alpha$ -copaene                          | 0.98         | 29           | 19.99 | <b>geranial</b>                                          | <b>19.69</b> |
| 10                   | 16.37 | unidentified                               | 0.37         | 30           | 20.11 | unidentified                                             | 0.88         |
| 11                   | 16.66 | (-)- $\beta$ -bourbonene                   | 0.40         | 31           | 20.22 | 2,6-octadien-1-ol, 3,7-dimethyl-, acetate                | 0.98         |
| 12                   | 16.92 | $\alpha$ -caryophyllene                    | 2.48         | 32           | 20.35 | $\delta$ -cadinene                                       | 2.55         |
| 13                   | 16.99 | $\beta$ -cubebene                          | 0.56         | 33           | 20.43 | $\gamma$ -cadinene                                       | 0.61         |
| 14                   | 17.16 | bicyclo[2.2.1]hept-2-ene, 2,7,7-trimethyl- | 2.19         | 34           | 20.75 | nerol                                                    | 0.23         |
| 15                   | 17.30 | unidentified                               | 0.30         | 35           | 20.79 | $\alpha$ -muurolene                                      | 0.20         |
| 16                   | 17.48 | unidentified                               | 1.20         | 36           | 21.24 | <i>trans</i> -geraniol                                   | 0.55         |
| 17                   | 17.62 | $\alpha$ -santalene                        | 0.30         | 37           | 22.80 | caryophyllene oxide                                      | 0.73         |
| 18                   | 17.92 | (-)- $\beta$ -elemene                      | 0.25         | 38           | 24.63 | $\tau$ -muurolol                                         | 0.71         |
| 19                   | 18.05 | unidentified                               | 0.66         | <b>Total</b> |       |                                                          | <b>99.53</b> |
| 20                   | 18.16 | <b><math>\beta</math>-caryophyllene</b>    | <b>21.62</b> |              |       |                                                          |              |
| <b>Bay laurel EO</b> |       |                                            |              |              |       |                                                          |              |
| 1                    | 8.48  | camphene                                   | 0.48         | 14           | 16.92 | linalool                                                 | 3.35         |
| 2                    | 9.21  | $\beta$ -pinene                            | 3.77         | 15           | 17.79 | bornyl acetate                                           | 0.52         |
| 3                    | 9.44  | sabinene                                   | 6.51         | 16           | 17.92 | $\beta$ -elemene                                         | 0.09         |
| 4                    | 9.92  | (+)-3-carene                               | 3.42         | 17           | 18.12 | (-)-terpinen-4-ol                                        | 2.32         |
| 5                    | 10.13 | $\beta$ -myrcene                           | 0.53         | 18           | 18.88 | <i>p</i> -mentha-1(7),8-diene                            | 0.24         |

|    |       |                        |              |           |       |                         |              |
|----|-------|------------------------|--------------|-----------|-------|-------------------------|--------------|
| 6  | 10.18 | $\alpha$ -phellandrene | 0.25         | <b>19</b> | 19.14 | estragole               | 0.44         |
| 7  | 10.43 | (+)-2-carene           | 0.45         | <b>20</b> | 19.55 | <b>terpinyl acetate</b> | <b>14.27</b> |
| 8  | 10.77 | limonene               | 3.68         | <b>21</b> | 20.75 | nerol                   | 0.44         |
| 9  | 11.03 | <b>eucalyptol</b>      | <b>45.96</b> | <b>22</b> | 22.81 | methyl eugenol          | 4.54         |
| 10 | 11.55 | $\gamma$ -terpinene    | 1.14         | <b>23</b> | 23.82 | spathulenol             | 0.08         |
| 11 | 11.96 | <i>p</i> -cymene       | 3.89         | <b>24</b> | 24.07 | eugenol                 | 1.36         |
| 12 | 12.19 | unidentified           | 0.40         |           |       |                         |              |
| 13 | 15.44 | unidentified           | 0.19         |           |       | <b>Total</b>            | <b>98.32</b> |

\*Retention times (min) were measured from the injection point; major compounds are shown in bold.

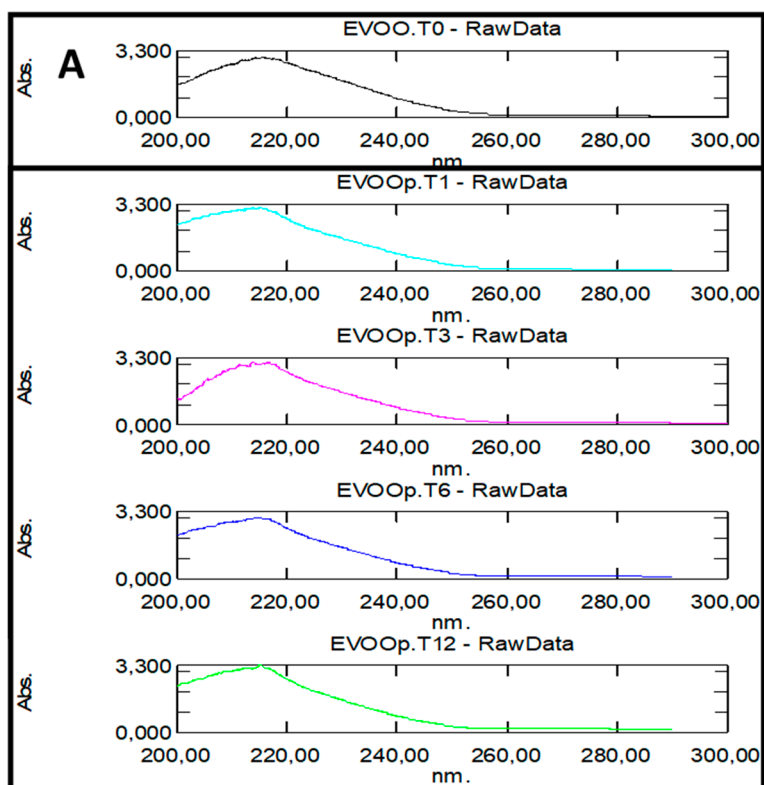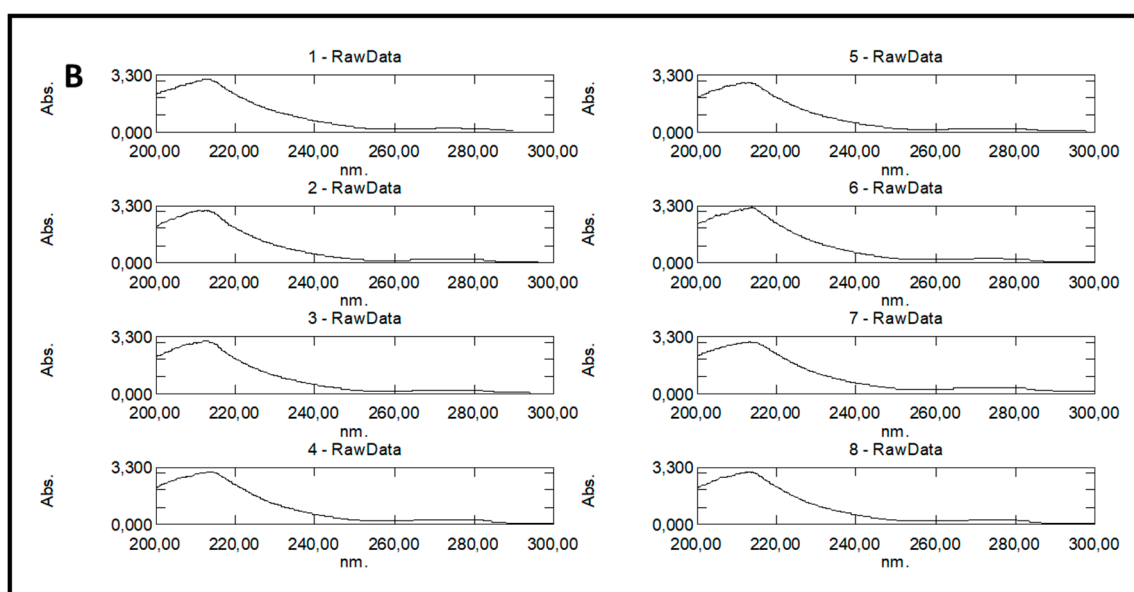

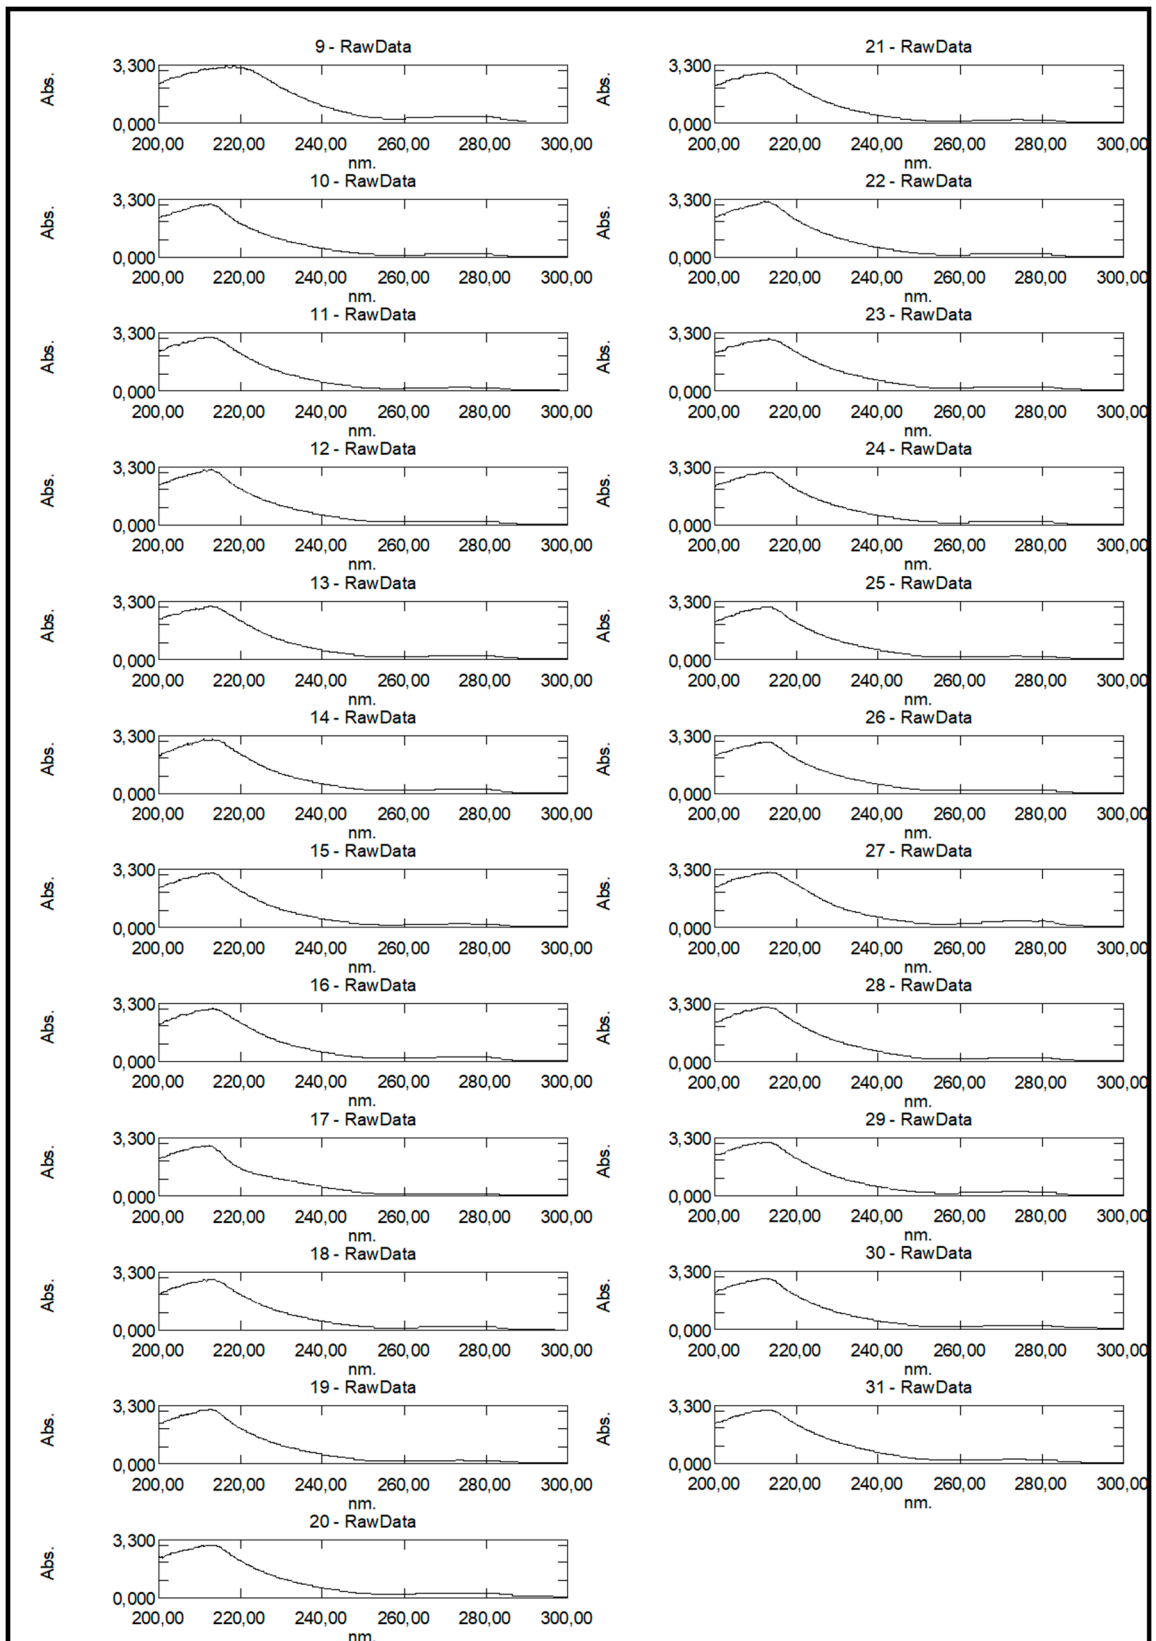

**Figure S2.** UV spectra of EVOO oils at T0 (oil base), T1, T3, T6 and T12 of storage period (A) and CCD oils (B). An oil dilution factor of 2 was applied for spectra acquisition of CCD oils as compared to EVOO oils.

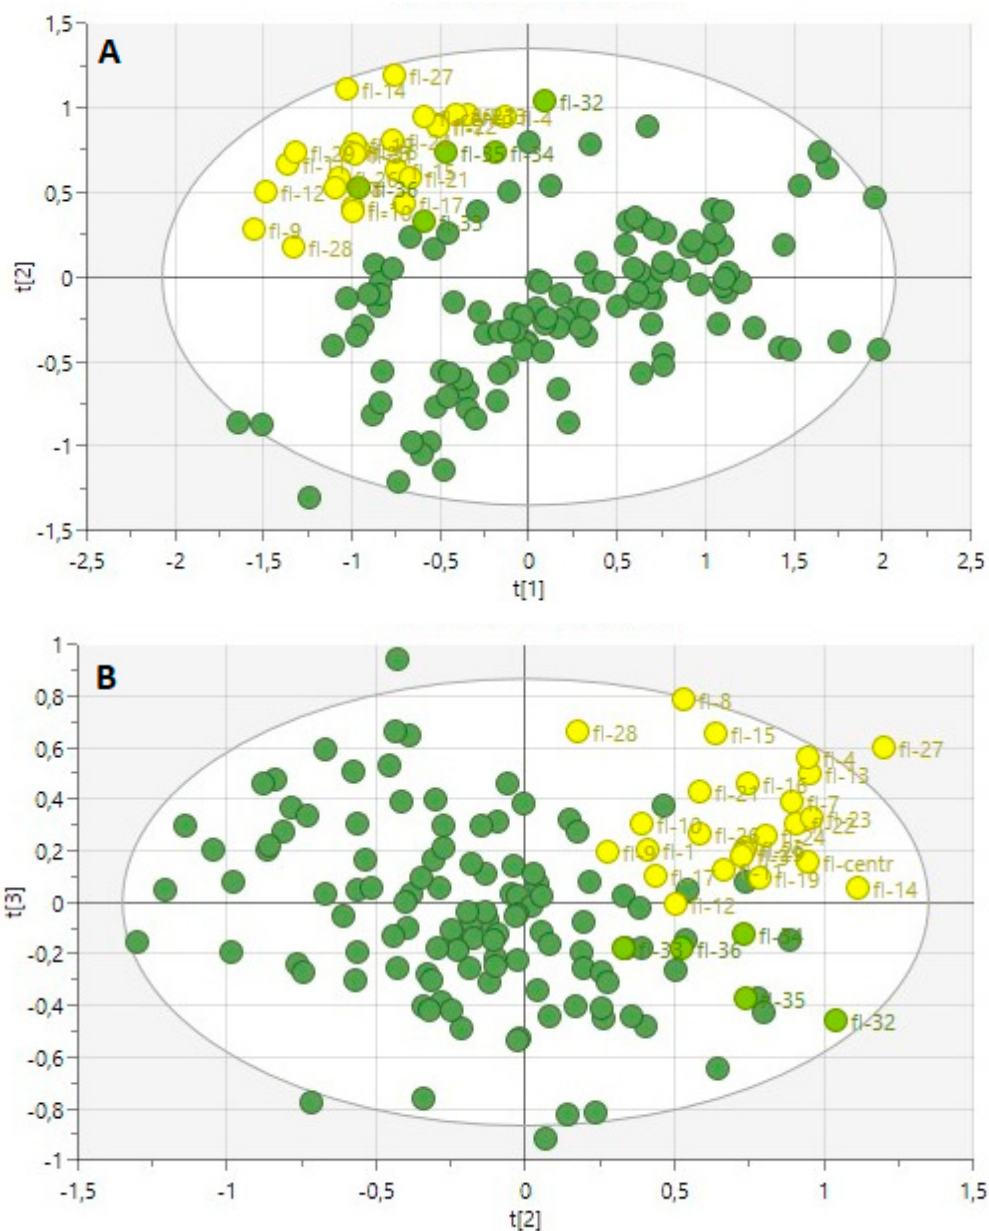

**Figure S3.** Scatterplots (PC1 vs PC2 and PC2 vs PC3) of principle component analysis (PCA) for FT-MIR spectra of virgin olive oils: VOOs spectral data base of the LFCT, (dark green); flavored VOOs spectral data for CCD samples 1-31 (yellow); base EVOO spectral data at storage time 0, 1, 6, 12, 18 months, light green (no 32-36). Spectra were obtained as described in § 2.7.
